# Supplementary material
Source: PubMed Central journal article supplement (PMC6417883)

## Supplemental Materials

**Supplemental Table 1:** Estimated remaining lifetime risk of heart failure with missing ejection fraction as compared with that of heart failure with preserved ejection fraction and heart failure with reduced ejection fraction at index age 45 without adjustment for competing risk

| HF subtype                | Lifetime Risk (%) (95% CI) |                       |                       |                       |
|---------------------------|----------------------------|-----------------------|-----------------------|-----------------------|
|                           | Men                        | Women                 | Black                 | Non-black             |
| <b>HFpEF</b>              | 12.6<br>(11.0 – 14.2)      | 11.9<br>(10.6 – 13.1) | 9.6<br>(7.4 – 11.7)   | 12.7<br>(11.6 – 13.8) |
| <b>HFrfEF</b>             | 12.6<br>(11.1 – 14.1)      | 6.5<br>(5.6 – 7.4)    | 9.0<br>(7.1 – 10.9)   | 8.9<br>(8.0 – 9.8)    |
| <b>HF with missing EF</b> | 17.0<br>(15.1 – 18.9)      | 14.4<br>(13.1 – 15.8) | 14.2<br>(11.5 – 16.8) | 15.7<br>(14.5 – 16.9) |

**Supplemental Table 2:** Estimated remaining lifetime risk of different heart failure phenotypes at index age 45 in the extreme case scenario sensitivity analysis assuming all missing EF as HFpEF and then assuming all missing EF as HFrEF.

|                   | <b>Lifetime risk (95% CI)</b>                                  |                                                                |                         |                      |
|-------------------|----------------------------------------------------------------|----------------------------------------------------------------|-------------------------|----------------------|
|                   | <b>Sensitivity analysis (Extreme Case Scenario)</b>            |                                                                | <b>Primary analysis</b> |                      |
|                   | <b>HFpEF<br/>(Assuming all missing<br/>EF events as HFpEF)</b> | <b>HFrEF<br/>(Assuming all missing EF<br/>events as HFrEF)</b> | <b>HFpEF</b>            | <b>HFrEF</b>         |
| <b>Men</b>        | 12.7<br>(11.2 – 14.1)                                          | 12.8<br>(11.4 – 14.3)                                          | 10.4<br>(9.1 – 11.6)    | 10.6<br>(9.4 – 11.8) |
| <b>Women</b>      | 13.0<br>(11.7 – 14.3)                                          | 7.2<br>(6.2 – 8.2)                                             | 10.7<br>(9.6 – 11.8)    | 5.8<br>(5.03 – 6.6)  |
| <b>Blacks</b>     | 9.5<br>(7.6 – 11.4)                                            | 9.4<br>(7.6 – 11.2)                                            | 7.7<br>(6.0 – 9.4)      | 7.7<br>(6.1 – 9.2)   |
| <b>Non-blacks</b> | 13.6<br>(12.4 – 14.7)                                          | 9.6<br>(8.67 – 10.50)                                          | 11.2<br>(10.2 – 12.1)   | 7.9<br>(7.1 – 8.7)   |

**Supplemental Table 3:** Estimated remaining lifetime risk of heart failure with preserved ejection fraction and heart failure with reduced ejection fraction at index age 45 across different sex- and race-based subgroups using different ejection fraction cut offs

| Group             | Lifetime Risk (%) (95% Confidence Interval) |                                            |                                        |                                            |
|-------------------|---------------------------------------------|--------------------------------------------|----------------------------------------|--------------------------------------------|
|                   | HFpEF with EF $\geq$ 45% (Primary analysis) | HFpEF with EF > 50% (Sensitivity analysis) | HFrEF with EF < 45% (Primary analysis) | HFrEF with EF < 40% (Sensitivity analysis) |
| <b>Blacks</b>     | 7.7<br>(6.0 – 9.4)                          | 5.3<br>(3.9 – 6.6)                         | 7.7<br>(6.1 – 9.2)                     | 6.8<br>(5.3 – 8.3)                         |
| <b>Non-blacks</b> | 11.2<br>(10.2 – 12.1)                       | 8.7<br>(7.9 – 9.6)                         | 7.9<br>(7.1 – 8.7)                     | 6.5<br>(5.8 – 7.2)                         |
| <b>Men</b>        | 10.4<br>(9.1 – 11.6)                        | 7.2<br>(6.1 – 8.3)                         | 10.6<br>(9.4 – 11.8)                   | 9.0<br>(7.8 – 10.2)                        |
| <b>Women</b>      | 10.7<br>(9.6 – 11.8)                        | 8.7<br>(7.7 – 9.8)                         | 5.8<br>(5.03 – 6.6)                    | 4.8<br>(4.1 – 5.6)                         |

**Supplemental Table 4:** Estimated remaining lifetime risk of heart failure with preserved ejection fraction and heart failure with reduced ejection fraction at different index ages among patients with vs. without history of Diabetes Mellitus at the baseline examination

| Index Age (y) | Lifetime Risk (%) (95% Confidence Interval) |                      |                      |                     |
|---------------|---------------------------------------------|----------------------|----------------------|---------------------|
|               | HFpEF                                       |                      | HFrEF                |                     |
|               | DMII                                        | No DMII              | DMII                 | No DMII             |
| <b>45</b>     | 11.9<br>(9.6 – 14.2)                        | 10.4<br>(9.5 – 11.3) | 11.6<br>(9.2 – 13.9) | 7.4<br>(6.6 – 8.1)  |
| <b>55</b>     | 11.9<br>(9.6 – 14.2)                        | 10.4<br>(9.5 – 11.3) | 11.6<br>(9.3 – 14.0) | 7.31<br>(6.6 – 8.0) |
| <b>65</b>     | 11.5<br>(9.2 – 13.8)                        | 10.4<br>(9.5 – 11.3) | 11.4<br>(9.0 – 13.8) | 7.3<br>(6.5 – 8.0)  |

**Supplemental Figure 1:** Age distribution of pooled study participants across the two cohorts

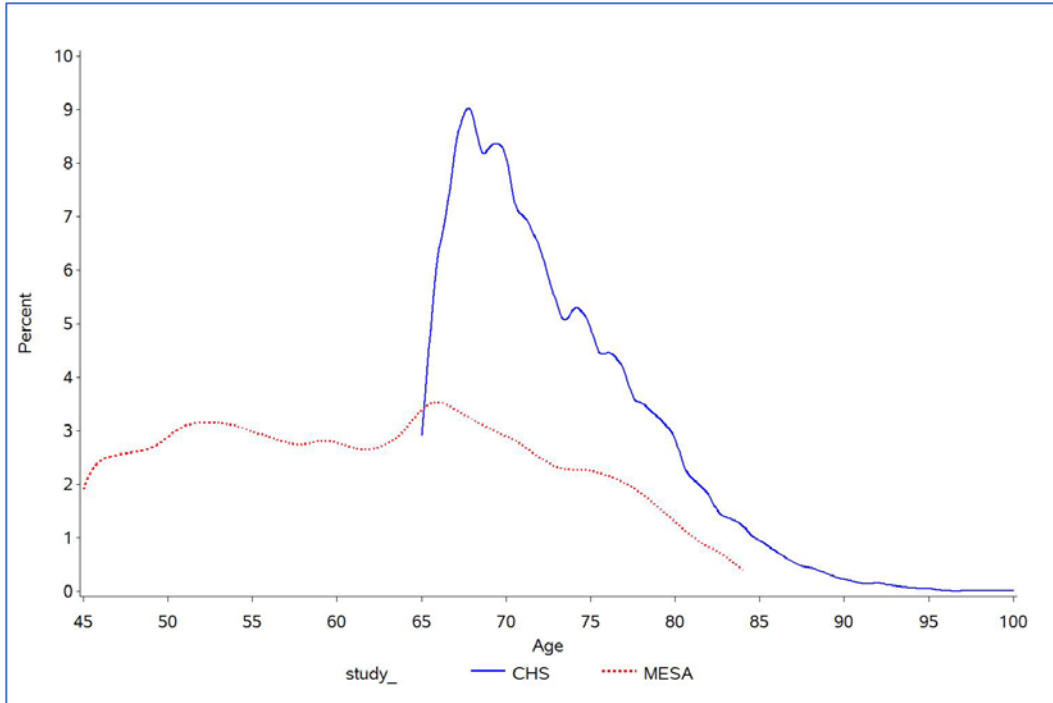

Supplement: NIHMS936373-supplement-Supplemental_data.pdf [file NIHMS936373-supplement-Supplemental_data.pdf]
